# Supplementary material for: Different Stakeholders’ Conceptualizations and Perspectives of Regenerative Agriculture Reveals More Consensus Than Discord
Source: MDPI journal article supplement (doi:10.3390/su142215261), 2022-11-17
Supplement: s1 [file s1]

## **Instrument - Farmers**

*This instrument provides questions to guide interviews with different stakeholders on regenerative agriculture. Key questions are numbered and follow-up prompts are bullet-pointed.*

**To start, can you tell me about your farming operation?**

- What do you produce?
- How many acres do you farm on?
- How long have you been farming?

**How would you describe the way that you farm?**

Now we will talk specifically about the term regenerative agriculture. Regenerative agriculture has received a lot of attention in the last few years, but we do not have a common definition of it. For example, some people define regenerative agriculture by specific farming practices, such as reduced tillage or using cover crops. Others list specific outcomes, like improved soil health, or increased biodiversity. I am interested to learn your perspectives on the regenerative agriculture movement and understand how you think about the concept.

**First, what interests you about regenerative agriculture?**

- How does regenerative agriculture relate to the way that you farm?

**Are there specific practices that you consider as regenerative agriculture? If so, what are they?**

- Examples: no/low external inputs, integrate livestock, not using synthetic fertilizers or pesticides, reduce/eliminate tillage

**What regenerative practices do you feel you are currently using?**

**What regenerative practices do you hope to add in the future?**

**Are there specific outcomes for regenerative agriculture? If so, what are they?**

- Examples: Improve soil health, sequester carbon, increase biodiversity

**Which of these outcomes are you currently achieving?**

**Which of these outcomes do you hope to achieve in the future?**

**Some people define regenerative agriculture by specific values. Are there specific values that you ascribe to regenerative agriculture? If so, what are they?**

- Examples: land stewardship, building resilient systems

**How do you relate to these values?**

**1) Regenerative agriculture follows many other food and agriculture movements. How do you differentiate regenerative agriculture from these other ideas?**

- Examples: organic farming, sustainable agriculture, permaculture, conservation farming

Now I am interested to learn about what you think the regenerative agriculture movement needs to be effective.

**What do you see is the role of farmers in the regenerative agriculture movement?**

**Aside from farmers, what other actors do you think are important to regenerative agriculture?**

**What actions are needed from other actors to support regenerative agriculture?**

**Often, food and agriculture movements seek to address social issues as well as environmental or economic challenges. In your opinion, how should a movement like regenerative agriculture address social issues?**

**Thank you for taking time to participate in this interview. Do you have any final thoughts you'd like to add?**

### **Instrument – Private Companies**

*This instrument provides questions to guide interviews with different stakeholders on regenerative agriculture. Key questions are numbered and follow-up prompts are bullet-pointed.*

**1) First, can you tell me about your organization?**

- What is your general mission and objectives?

Now we will talk specifically about the term regenerative agriculture. Regenerative agriculture has received a lot of attention in the last few years, but we do not have a common definition of it. For example, some people define regenerative agriculture by specific farming practices, such as reduced tillage or using cover crops. Others list specific outcomes, like improved soil health, or increased biodiversity. I am interested to learn your perspectives on the regenerative agriculture movement and understand how you think about the concept.

**2) What is your relationship with regenerative agriculture?**

- How did you get interested in regenerative agriculture?
- What role does it play in your work?

**3) Are there specific practices that you consider as regenerative agriculture? If so, what are they?**

- Examples: no/low external inputs, integrate livestock, not using synthetic fertilizers or pesticides, reduce/eliminate tillage

**4) Are there specific outcomes for regenerative agriculture? If so, what are they?**

- Examples: Improve soil health, sequester carbon, increase biodiversity

**5) Some people define regenerative agriculture by specific values. Are there specific values that you ascribe to regenerative agriculture? If so, what are they?**

- Examples: land stewardship

**6) How do you relate to these values?**

**7) Regenerative agriculture is a movement that follows many other food and agriculture movements. How do you differentiate regenerative agriculture from these other ideas?**

- Examples: organic farming, sustainable agriculture, permaculture, conservation farming

**8) What do you see the role of nonprofits in the regenerative agriculture movement?**

**9) Aside from nonprofits, what other actors do you see as essential to progressing the regenerative agriculture movement?**

- Farmers, policy, private companies
- What role should they play?

**10) What actions are needed from other actors to support regenerative agriculture?**

**11) Often, food and agriculture movements seek to address social issues as well as environmental or economic challenges. In your opinion, how should a movement like regenerative agriculture address social issues?**

- In what ways does regenerative agriculture seek to address social issues?
- What is currently being done?

**i) Several US food and agriculture movements have been criticized for excluding or making invisible people of color. How do you see regenerative agriculture in relation to this problem?**

**12) Thank you for taking time to participate in this interview. Do you have any final thoughts you'd like to add?**

### **Instrument - Researchers**

*This instrument provides questions to guide interviews with different stakeholders on regenerative agriculture. Key questions are numbered and follow-up prompts are bullet-pointed.*

**To start, can you tell me about your research?**

Now we will talk specifically about the term regenerative agriculture. Regenerative agriculture has received a lot of attention in the last few years, but we do not have a common definition of it. For example, some people define regenerative agriculture by specific farming practices, such as reduced tillage or using cover crops. Others list specific outcomes, like improved soil health, or increased biodiversity. I am interested to learn your perspectives on the regenerative agriculture movement and understand how you think about the concept.

**First, in your opinion, how does your research relate to regenerative agriculture?**

- How did you get interested in regenerative agriculture?
- What role does it play in your work?

**Are there specific practices that you consider as regenerative agriculture? If so, what are they?**

- Examples: no/low external inputs, integrate livestock, not using synthetic fertilizers or pesticides, reduce/eliminate tillage

**Are there specific outcomes for regenerative agriculture? If so, what are they?**

- Examples: Improve soil health, sequester carbon, increase biodiversity

**Some people define regenerative agriculture by specific values. Are there specific values that you ascribe to regenerative agriculture? If so, what are they?**

- Examples: land stewardship

**How do you relate to these values?**

**Regenerative agriculture is a movement that follows many other food and agriculture movements. How do you differentiate regenerative agriculture from these other ideas?**

- Examples: organic farming, sustainable agriculture, permaculture, conservation farming

**What do you see the role of researchers in the regenerative agriculture movement?**

**Aside from researchers, what other actors do you see as essential to progressing the regenerative agriculture movement?**

- Farmers, policy, private companies
- What role should they play?

**What actions are needed from other actors to support regenerative agriculture?**

**Often, food and agriculture movements seek to address social issues as well as environmental or economic challenges. In your opinion, how should a movement like regenerative agriculture address social issues?**

- In what ways does regenerative agriculture seek to address social issues?
- What is currently being done?
- Several US food and agriculture movements have been criticized for excluding or making invisible people of color. How do you see regenerative agriculture in relation to this problem?

**Thank you for taking time to participate in this interview. Do you have any final thoughts you'd like to add?**

### **Instrument – Nongovernment agencies and nonprofits**

*This instrument provides questions to guide interviews with different stakeholders on regenerative agriculture. Key questions are numbered and follow-up prompts are bullet-pointed.*

**13) First, can you tell me about your organization?**

- What is your general mission and objectives?

Now we will talk specifically about the term regenerative agriculture. Regenerative agriculture has received a lot of attention in the last few years, but we do not have a common definition of it. For example, some people define regenerative agriculture by specific farming practices, such as reduced tillage or using cover crops. Others list specific outcomes, like improved soil health, or increased biodiversity. I am interested to learn your perspectives on the regenerative agriculture movement and understand how you think about the concept.

**14) What is your relationship with regenerative agriculture?**

- How did you get interested in regenerative agriculture?
- What role does it play in your work?

**15) Are there specific practices that you consider as regenerative agriculture? If so, what are they?**

- Examples: no/low external inputs, integrate livestock, not using synthetic fertilizers or pesticides, reduce/eliminate tillage

**16) Are there specific outcomes for regenerative agriculture? If so, what are they?**

- Examples: Improve soil health, sequester carbon, increase biodiversity

**17) Some people define regenerative agriculture by specific values. Are there specific values that you ascribe to regenerative agriculture? If so, what are they?**

- Examples: land stewardship

**18) How do you relate to these values?**

**19) Regenerative agriculture is a movement that follows many other food and agriculture movements. How do you differentiate regenerative agriculture from these other ideas?**

- Examples: organic farming, sustainable agriculture, permaculture, conservation farming

**20) What do you see the role of nonprofits in the regenerative agriculture movement?**

**21) Aside from nonprofits, what other actors do you see as essential to progressing the regenerative agriculture movement?**

- Farmers, policy, private companies
- What role should they play?

**22) What actions are needed from other actors to support regenerative agriculture?**

**23) Often, food and agriculture movements seek to address social issues as well as environmental or economic challenges. In your opinion, how should a movement like regenerative agriculture address social issues?**

- In what ways does regenerative agriculture seek to address social issues?
- What is currently being done?

**i) Several US food and agriculture movements have been criticized for excluding or making invisible people of color. How do you see regenerative agriculture in relation to this problem?**

**24) Thank you for taking time to participate in this interview. Do you have any final thoughts you'd like to add?**
